# Supplementary material for: The ‘Shape-Shifter’ Peptide from the Disulphide Isomerase PmScsC Shows Context-Dependent Conformational Preferences
Source: MDPI journal article supplement (doi:10.3390/biom11050642), 2021-04-26

**Figure S2.** Overlay of the natural abundance  $^1\text{HN}$ - $^{15}\text{N}$  HSQC spectra of the shape-shifter peptide in  $\text{H}_2\text{O}$  (black) and in 50% TFE (red) at pH 7 collected at 600 and 500 MHz, respectively. Peaks are labelled with their sequence-specific assignments.

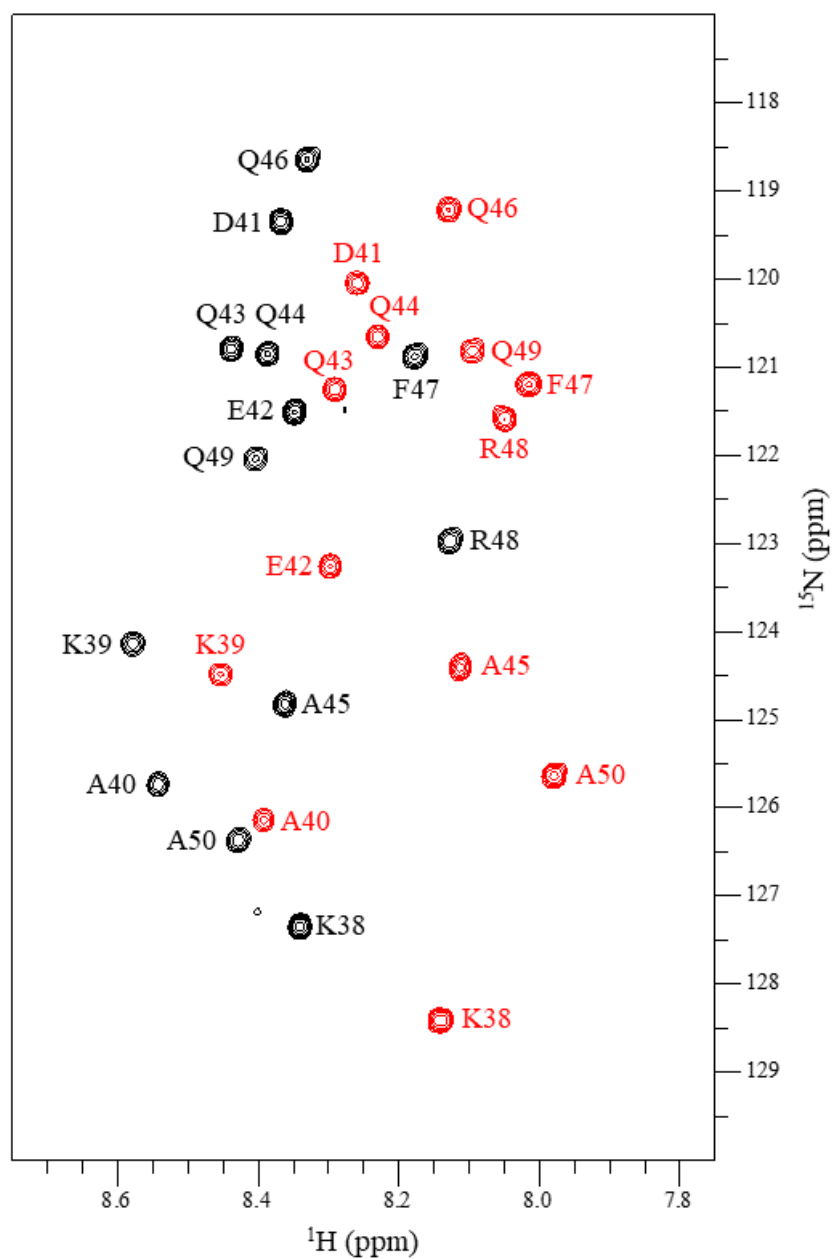

Supplement: s1 [file s1]
