# Supplementary material for: The ‘Shape-Shifter’ Peptide from the Disulphide Isomerase PmScsC Shows Context-Dependent Conformational Preferences
Source: MDPI journal article supplement (doi:10.3390/biom11050642), 2021-04-26

**Figure S1.** Overlay of the  $^1\text{H}\alpha$ - $^{13}\text{C}\alpha$  region of the natural abundance  $^1\text{H}$ - $^{13}\text{C}$  HSQC spectra of the shape-shifter peptide in  $\text{H}_2\text{O}$  (black) and in 50% TFE (red) at pH 7 collected at 600 and 500 MHz, respectively. Peaks are labelled with their sequence-specific assignment. The increase in helical propensity in 50% TFE can be seen clearly by the upfield shift of  $^1\text{H}\alpha$  and the downfield shift of  $^{13}\text{C}\alpha$  in TFE relative to  $\text{H}_2\text{O}$  buffer.

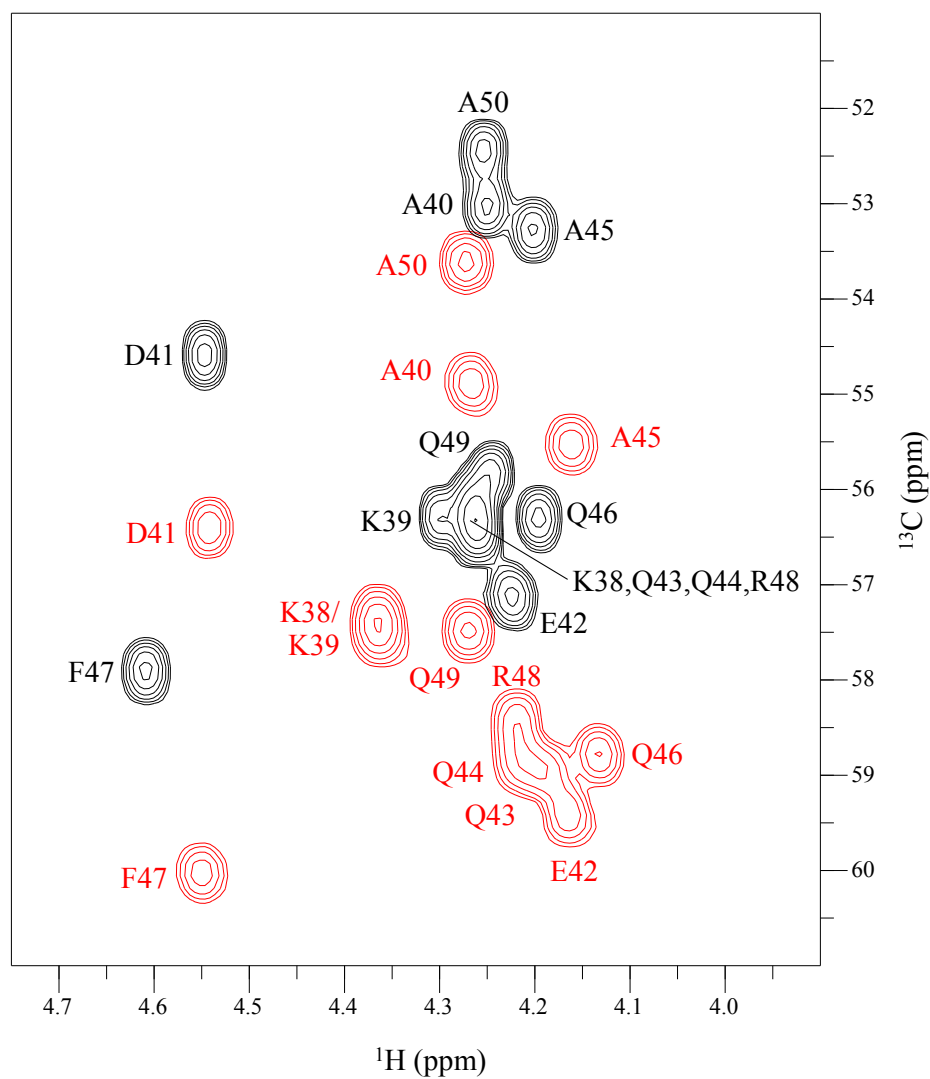

Supplement: s1 [file s1]
